# Supplementary material for: Total incombustible (mineral) content of Cherax quadricarinatus differs between feral populations in Central-Eastern Australia
Source: PeerJ. 2019 Feb 1;7:e6351. doi: 10.7717/peerj.6351 (PMC6361003; doi:10.7717/peerj.6351)
Supplement: Supplemental Information 1 — Each row consists of the data, for the variables of interest, for all crayfish used in this study. [file peerj-07-6351-s001.xls]

## Sheet: MS23299 Final Data
Tierney, Wild and Furse (2019) Site, Crayfish and % DWT Incombustible (mineral) Content Data
Crayfish Number	Location of Capture	Gender	OCL (mm)	Total Incombustible Content (% DWT)
1	L. Ainsworth	Female	45.05	36.6202
2	L. Ainsworth	Female	48.33	35.4651
3	L. Ainsworth	Male	49.73	41.5762
4	L. Ainsworth	Female	48.44	36.5277
5	L. Ainsworth	Female	45.29	38.5072
6	L. Ainsworth	Female	45.18	43.9686
7	L. Ainsworth	Male	46.28	39.0927
8	L. Ainsworth	Female	45.17	37.4745
9	L. Ainsworth	Male	46.56	38.7572
10	L. Ainsworth	Male	46.58	42.7348
11	L. Ainsworth	Female	42.59	42.7222
12	L. Ainsworth	Male	49.05	34.9239
13	L. Ainsworth	Female	45.55	42.4734
14	L. Ainsworth	Male	46.73	39.5991
15	L. Ainsworth	Female	46.92	34.467
16	L. Ainsworth	Female	47.87	40.0567
17	L. Ainsworth	Female	48.96	35.2686
18	L. Ainsworth	Female	39.33	39.0563
19	L. Ainsworth	Female	44.23	40.1605
20	L. Ainsworth	Female	44.4	44.2132
21	L. Ainsworth	Female	42.08	36.9751
22	L. Ainsworth	Male	45.2	48.2435
23	L. Ainsworth	Male	40.61	48.763
24	L. Ainsworth	Male	41.72	39.9294
25	L. Ainsworth	Female	41.67	43.0648
26	L. Ainsworth	Female	45.35	40.7244
27	L. Ainsworth	Male	40.34	39.1258
28	L. Ainsworth	Female	40.71	43.9977
29	L. Ainsworth	Male	41.5	42.8858
30	L. Ainsworth	Female	42.3	37.2926
31	L. Ainsworth	Female	42.33	36.4198
32	L. Ainsworth	Female	34.2	36.8908
33	L. Ainsworth	Male	39.88	38.5693
34	L. Ainsworth	Female	45.74	42.8211
35	L. Ainsworth	Male	36.26	40.8393
36	L. Ainsworth	Female	39.73	45.5385
37	L. Ainsworth	Female	44.55	44.8248
38	L. Ainsworth	Male	20.64	37.8877
39	L. Ainsworth	Male	47.77	36.8138
40	L. Ainsworth	Female	46.58	41.0467
41	L. Ainsworth	Female	48.28	39.3704
42	L. Ainsworth	Female	45.34	40.1569
43	L. Ainsworth	Female	42.99	39.3766
44	L. Ainsworth	Female	46.95	42.5516
45	L. Ainsworth	Female	51.22	49.5195
46	L. Ainsworth	Female	47.53	51.2479
47	L. Ainsworth	Male	46.23	41.8009
48	L. Ainsworth	Male	46.45	38.8209
49	L. Ainsworth	Female	42.85	40.8819
50	L. Ainsworth	Male	49.67	39.5719
51	L. Ainsworth	Male	45.4	44.5153
52	L. Ainsworth	Female	44.56	37.2624
53	L. Ainsworth	Male	50.65	47.4352
54	L. Ainsworth	Male	51.93	45.7103
55	L. Ainsworth	Male	46.12	42.9433
56	L. Ainsworth	Female	47.14	38.8311
57	L. Ainsworth	Female	45.75	38.2522
58	L. Ainsworth	Female	49.7	41.4541
59	Emigrant Ck.	Male	8.2	50.2646
60	Emigrant Ck.	Male	52.51	51.8861
61	Emigrant Ck.	Male	59.79	50.2571
62	L. Ainsworth	Male	56.13	40.7686
63	L. Ainsworth	Male	56.87	37.0439
64	L. Ainsworth	Female	57.46	43.9423
65	L. Ainsworth	Female	54.24	43.6805
66	L. Ainsworth	Male	64.22	47.4111
67	L. Ainsworth	Male	62.86	56.7512
68	L. Ainsworth	Male	57.16	58.5789
69	L. Ainsworth	Male	57.35	40.7696
70	L. Ainsworth	Male	54.54	44.026
71	L. Ainsworth	Male	56.34	41.9053
72	L. Ainsworth	Female	57	42.383
73	L. Ainsworth	Female	53.65	46.6276
74	L. Ainsworth	Female	53.21	44.2924
75	L. Ainsworth	Female	52.98	54.9494
76	L. Moogerah	Female	54.82	55.2078
77	L. Moogerah	Female	60.51	41.9482
78	L. Somerset	Female	64.8	46.3673
79	L. Somerset	Male	58.13	47.3992
80	L. Somerset	Female	42.17	52.4316
81	L. Somerset	Male	42.56	47.9792
82	L. Somerset	Female	55.93	49.7137
83	L. Somerset	Male	43.43	56.2135
84	L. Somerset	Indeterminate	44.1	55.5844
85	L. Somerset	Male	37.95	43.4277
86	L. Somerset	Female	27.82	44.1927
87	L. Somerset	Male	26.48	45.1866
88	L. Somerset	Male	45.66	44.7168
89	L. Dyer	Male	41.09	48.1464
90	L. Dyer	Female	50.13	46.4389
91	L. Dyer	Female	46.38	53.7329
92	L. Dyer	Female	45.23	36.1287
93	L. Somerset	Female	62.63	44.2139
94	L. Somerset	Female	60.02	44.0345
95	L. Somerset	Female	35.45	46.8432
96	L. Somerset	Female	67.41	51.0614
97	L. Somerset	Male	47.56	59.5342
98	L. Somerset	Male	48.66	56.9971
99	L. Somerset	Female	45	45.6509
100	L. Somerset	Male	44.98	45.8318
101	L. Somerset	Female	43.71	49.013
102	L. Somerset	Female	37.42	51.8296
